# Supplementary material for: Effect of Rubus idaeus Extracts in Murine Chondrocytes and Explants
Source: MDPI journal article supplement (doi:10.3390/biom11020245), 2021-02-09
Supplement: s1 [file s1]

Supplementary file

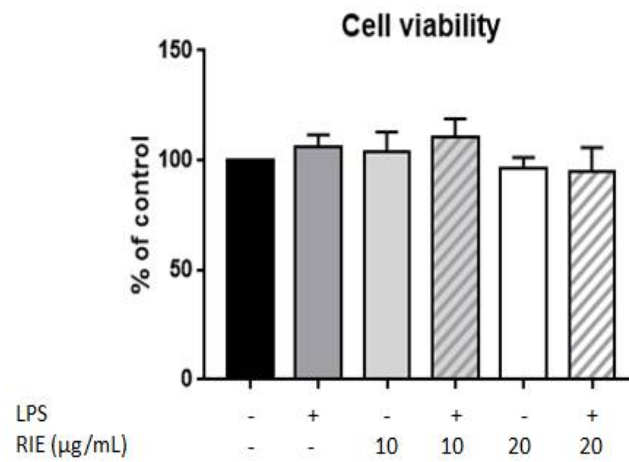

Supplemental Figure 1: Cell viability of macrophages does not change with treatment of LPS or RIE. The cell viability of macrophages is not altered with the pre-treatment of RIE (with 10 or 20 μg/mL) and with the stimulation of LPS (100 ng/mL). Data are mean±SEM from four experiments.
